# Supplementary material for: Cross-Cultural Adaptation of the Community Healthy Activities Model Program for Seniors (CHAMPS) Physical Activity Questionnaire Among Hausa Older Adults
Source: Research Square preprint supplement (doi:10.21203/rs.3.rs-8564131/v1), 2026-01-16
Supplement: Supplementary file 1 [file 2a8e1133b90f185461dd8b39.docx]

CHAMPS Activities Questionnaire for Older Adults

CHAMPS: Community Healthy Activities Model Program for Seniors Institute for Health & Aging, University of California San Francisco Stanford Center for Research in Disease Prevention, Stanford University (11/06/00) © Copyright 1998

Date: Name or ID:

Do not reproduce without permission of the CHAMPS staff Contact: Anita L. Stewart, Ph.D., UCSF, [anitast@itsa.ucsf.edu](mailto:anitast@itsa.ucsf.edu)

**This questionnaire is on the activities that you may have done in the past 4 weeks. The questions on the following pages are same with the example provided below**

**INSTRUCTIONS**

**If you DID the activity in the past 4 weeks: Step #1 Look at the YES box.**

**Step #2 Think about how many TIMES in a week you usually did it, and write your answer in the provided space.**

**Step #3 Circle the total number of hours in a week you did the activity.**

**Here is an example of how Mrs. Bala would answer question #1:** Mrs. Bala usually visits her friends Maryam and Fatima twice a week. She usually spends one hour with Maryam every on Monday and two hours every on Wednesday with Fatima. Thus, the total hours a week that she visits with friends is three hours a week.

| **In every week during the past 4 weeks, did you…** |  | | | | | | |
| --- | --- | --- | --- | --- | --- | --- | --- |
| 1. 1. Visit your friends or family (other than those you live with)? 2. □ **YES** How many times in a week?  3. □ **NO** | How many TOTAL hours a week did you usually do it?  | Less than  1 hour | 1-2½  hours | 3-4½  hours | 5-6½  hours | 7-8½  hours | 9 or more hours |

**If you DID NOT do this activity:**

**• Select tick the NO box and check the next question**

| **In a typical week during the past 4 weeks, did you …** |  | | | | | | |
| --- | --- | --- | --- | --- | --- | --- | --- |
| 1. Visit your friends or family (other than those you live with)? | How many TOTAL hours a week did you usually do it?  | Less than  1 hour | 1-2½  hours | 3-4½  hours | 5-6½  hours | 7-8½  hours | 9 or more hours |
| **YES** How many TIMES a week?   **NO** |
| 2. Go to elderly people meeting point? (e.g. retirees) | How many TOTAL hours a week did you usually do it?  | Less than  1 hour | 1-2½  hours | 3-4½  hours | 5-6½  hours | 7-8½  hours | 9 or more hours |
| **YES** How many TIMES a week?  |
| **NO** |
| 3. Do voluntary work?? | How many TOTAL hours a week did you usually do it?  | Less than  1 hour | 1-2½  hours | 3-4½  hours | 5-6½  hours | 7-8½  hours | 9 or more hours |
| **YES** How many TIMES a week?  |
| **NO** |
| 4. Attend a worship place or take part in worship activities?? | How many TOTAL hours a week did you usually do it?  | Less than  1 hour | 1-2½  hours | 3-4½  hours | 5-6½  hours | 7-8½  hours | 9 or more hours |
| **YES** How many TIMES a week?  |
| **NO** |
| 5. Attend other club or association meetings? | How many TOTAL hours a week did you usually do it?  | Less than  1 hour | 1-2½  hours | 3-4½  hours | 5-6½  hours | 7-8½  hours | 9 or more hours |
| **YES** How many TIMES a week?  |
| **NO** |
| 6. Use a cellular (handset)?? | How many TOTAL hours a week did you usually do it?  | Less than  1 hour | 1-2½  hours | 3-4½  hours | 5-6½  hours | 7-8½  hours | 9 or more hours |
| **YES** How many TIMES a week?  |
| **NO** |

| **In a typical week during the past 4 weeks, did you …** |  | | | | | | |
| --- | --- | --- | --- | --- | --- | --- | --- |
| 7. Dance (such as traditional dances) (Do not count fitness dance)? | How many TOTAL hours a week did you usually do it?  | Less than  1 hour | 1-2½  hours | 3-4½  hours | 5-6½  hours | 7-8½  hours | 9 or more hours |
| **YES** How many TIMES a week?  |
| **NO** |
| 8. Do needlework, woodwork, sewing etc. | How many TOTAL hours a week did you usually do it?  | Less than  1 hour | 1-2½  hours | 3-4½  hours | 5-6½  hours | 7-8½  hours | 9 or more hours |
| **YES** How many TIMES a week?  |
| **NO** |
| 9. Go to market, carrying your load (count walking time only)?? | How many TOTAL hours a week did you usually do it?  | Less than  1 hour | 1-2½  hours | 3-4½  hours | 5-6½  hours | 7-8½  hours | 9 or more hours |
| **YES** How many TIMES a week?  |
| **NO** |
| 10. Go to market, carrying your light load or given it to porter (count walking time only)? | How many TOTAL hours a week did you usually do it?  | Less than  1 hour | 1-2½  hours | 3-4½  hours | 5-6½  hours | 7-8½  hours | 9 or more hours |
| **YES** How many TIMES a week?  |
| **NO** |
| 11. Attend a concert, cinema, lecture, or sport event? | How many TOTAL hours a week did you usually do it?  | Less than  1 hour | 1-2½  hours | 3-4½  hours | 5-6½  hours | 7-8½  hours | 9 or more hours |
| **YES** How many TIMES a week?  |
| **NO** |
| 12. Play cards, Dara game, Ludo with other people? | How many TOTAL hours a week did you usually do it?  | Less than  1 hour | 1-2½  hours | 3-4½  hours | 5-6½  hours | 7-8½  hours | 9 or more hours |
| **YES** How many TIMES a week?  |
| **NO** |

| **In a typical week during the past 4 weeks, did you …** |  | | | | | | |
| --- | --- | --- | --- | --- | --- | --- | --- |
| 13. Play snooker? | How many TOTAL hours a week did you usually do it?  | Less than  1 hour | 1-2½  hours | 3-4½  hours | 5-6½  hours | 7-8½  hours | 9 or more hours |
| **YES** How many TIMES a week?  |
| **NO** |
| 14. Fetching water from the well into your house (Do not count fetching water from the tap with someone)? | How many TOTAL hours a week did you usually do it?  | Less than  1 hour | 1-2½  hours | 3-4½  hours | 5-6½  hours | 7-8½  hours | 9 or more hours |
| **YES** How many TIMES a week?  |
| **NO** |
| 15. Fetching water from the tap into your house (Do not count fetching water from the well)? | How many TOTAL hours a week did you usually do it?  | Less than  1 hour | 1-2½  hours | 3-4½  hours | 5-6½  hours | 7-8½  hours | 9 or more hours |
| **YES** How many TIMES a week?  |
| **NO** |
| 16. Jumping (for exercise)? | How many TOTAL hours a week did you usually do it?  | Less than  1 hour | 1-2½  hours | 3-4½  hours | 5-6½  hours | 7-8½  hours | 9 or more hours |
| **YES** How many TIMES a week?  |
| **NO** |
| 17. Play with musical instrument? | How many TOTAL hours a week did you usually do it?  | Less than  1 hour | 1-2½  hours | 3-4½  hours | 5-6½  hours | 7-8½  hours | 9 or more hours |
| **YES** How many TIMES a week?  |
| **NO** |
| 18. Read? | How many TOTAL hours a week did you usually do it?  | Less than  1 hour | 1-2½  hours | 3-4½  hours | 5-6½  hours | 7-8½  hours | 9 or more hours |
| **YES** How many TIMES a week?  |
| **NO** |
| 19. Do heavy work within the house (such as washing window, cleaning gutter)?? | How many TOTAL hours a week did you usually do it?  | Less than  1 hour | 1-2½  hours | 3-4½  hours | 5-6½  hours | 7-8½  hours | 9 or more hours |
| **YES** How many TIMES a week?   **NO** |

| **In a typical week during the past 4 weeks, did you …** |  | | | | | | |
| --- | --- | --- | --- | --- | --- | --- | --- |
| 20. Do light work within the house (such as sweeping or cleaning)? | How many TOTAL hours a week did you usually do it?  | Less than  1 hour | 1-2½  hours | 3-4½  hours | 5-6½  hours | 7-8½  hours | 9 or more hours |
| **YES** How many TIMES a week?  |
| **NO** |
| 21. Do heavy gardening (such as spading, raking, cutting grass )? | How many TOTAL hours a week did you usually do it?  | Less than  1 hour | 1-2½  hours | 3-4½  hours | 5-6½  hours | 7-8½  hours | 9 or more hours |
| **YES** How many TIMES a week?   **NO** |
| 22. Do light gardening activities at the backyard (such as watering plants)? | How many TOTAL hours a week did you usually do it?  | Less than  1 hour | 1-2½  hours | 3-4½  hours | 5-6½  hours | 7-8½  hours | 9 or more hours |
| **YES** How many TIMES a week?   **NO** |
| 23. Repair your car, truck, motorcycle and other machineries?? | How many TOTAL hours a week did you usually do it?  | Less than  1 hour | 1-2½  hours | 3-4½  hours | 5-6½  hours | 7-8½  hours | 9 or more hours |
| **YES** How many TIMES a week?   **NO** |

**Please note: the following questions are about running and walking, include use of a treadmill**

| 24. Jog or run?  **YES** How many TIMES a week?   **NO** | How many TOTAL hours a week did you usually do it?  | Less than  1 hour | 1-2½  hours | 3-4½  hours | 5-6½  hours | 7-8½  hours | 9 or more hours |
| --- | --- | --- | --- | --- | --- | --- | --- |
| 25. Climbing stairs with moderate pace (count ascending stair time )?? | How many TOTAL hours a week did you usually do it?  | Less than  1 hour | 1-2½  hours | 3-4½  hours | 5-6½  hours | 7-8½  hours | 9 or more hours |
| **YES** How many TIMES a week?  |
| **NO** |

| **In a typical week during the past 4 weeks, did you …** |  | | | | | | |
| --- | --- | --- | --- | --- | --- | --- | --- |
| 26. Walk fast or briskly for exercise (do not count walking leisurely? | How many TOTAL hours a week did you usually do it?  | Less than  1 hour | 1-2½  hours | 3-4½  hours | 5-6½  hours | 7-8½  hours | 9 or more hours |
| **YES** How many TIMES a week?   **NO** |
| 27. Walk to shop (such as from market to the house or picking children from school (count walking time only)?? | How many TOTAL hours a week did you usually do it?  | Less than  1 hour | 1-2½  hours | 3-4½  hours | 5-6½  hours | 7-8½  hours | 9 or more hours |
| **YES** How many TIMES a week?   **NO** |
| 28. Walk leisurely for exercise or pleasure? | How many TOTAL hours a week did you usually do it?  | Less than  1 hour | 1-2½  hours | 3-4½  hours | 5-6½  hours | 7-8½  hours | 9 or more hours |
| **YES** How many TIMES a week?  |
| **NO** |
| 29. Ride a bicycle or stationary cycle? | How many TOTAL hours a week did you usually do it?  | Less than  1 hour | 1-2½  hours | 3-4½  hours | 5-6½  hours | 7-8½  hours | 9 or more hours |
| **YES** How many TIMES a week?  |
| **NO** |
| 30. use aerobic machines such as rowing, or step machines (do not count treadmill or stationary cycle)? | How many TOTAL hours a week did you usually do it?  | Less than  1 hour | 1-2½  hours | 3-4½  hours | 5-6½  hours | 7-8½  hours | 9 or more hours |
| **YES** How many TIMES a week?   **NO** |
| 31. Farming moderate effort | How many TOTAL hours a week did you usually do it?  | Less than  1 hour | 1-2½  hours | 3-4½  hours | 5-6½  hours | 7-8½  hours | 9 or more hours |
| **YES** How many TIMES a week?   **NO** |

| **In a typical week during the past 4 weeks, did you …** |  | | | | | | |
| --- | --- | --- | --- | --- | --- | --- | --- |
| 32. Farming light effort | How many TOTAL hours a week did you usually do it?  | Less than  1 hour | 1-2½  hours | 3-4½  hours | 5-6½  hours | 7-8½  hours | 9 or more hours |
| **YES** How many TIMES a week?  |
| **NO** |
| 33. Farming, feeding small animals? | How many TOTAL hours a week did you usually do it?  | Less than  1 hour | 1-2½  hours | 3-4½  hours | 5-6½  hours | 7-8½  hours | 9 or more hours |
| **YES** How many TIMES a week?  |
| **NO** |
| 34. Do stretching or flexible exercises (do not count meditating time)? | How many TOTAL hours a week did you usually do it?  | Less than  1 hour | 1-2½  hours | 3-4½  hours | 5-6½  hours | 7-8½  hours | 9 or more hours |
| **YES** How many TIMES a week?  |
| **NO** |
| 35. Do meditation? | How many TOTAL hours a week did you usually do it?  | Less than  1 hour | 1-2½  hours | 3-4½  hours | 5-6½  hours | 7-8½  hours | 9 or more hours |
| **YES** How many TIMES a week?  |
| **NO** |
| 36. Do aerobics or aerobic dancing? | How many TOTAL hours a week did you usually do it?  | Less than  1 hour | 1-2½  hours | 3-4½  hours | 5-6½  hours | 7-8½  hours | 9 or more hours |
| **YES** How many TIMES a week?  |
| **NO** |
| 37. Do moderate to heavy training in order to strengthening your body (such as lifting a weights of more than 2 kilograms, weight machines, etc.)? | How many TOTAL hours a week did you usually do it?  | Less than  1 hour | 1-2½  hours | 3-4½  hours | 5-6½  hours | 7-8½  hours | 9 or more hours |
| **YES** How many TIMES a week?  |
| **NO** |

| **In a typical week during the past 4 weeks, did you …** |  | | | | | | |
| --- | --- | --- | --- | --- | --- | --- | --- |
| 38. Do light strength training (such as lifting a weights of 2kg. or less or elastic bands)? | How many TOTAL hours a week did you usually do it?  | Less than  1 hour | 1-2½  hours | 3-4½  hours | 5-6½  hours | 7-8½  hours | 9 or more hours |
| **YES** How many TIMES a week?  |
| **NO** |
| 39. Do general body exercises, such as light gymnastics exercise (do not count strength training)? | How many TOTAL hours a week did you usually do it?  | Less than  1 hour | 1-2½  hours | 3-4½  hours | 5-6½  hours | 7-8½  hours | 9 or more hours |
| **YES** How many TIMES a week?  |
| **NO** |
| 40. Play basketball, soccer, or racquetball (do not count time on sidelines)? | How many TOTAL hours a week did you usually do it?  | Less than  1 hour | 1-2½  hours | 3-4½  hours | 5-6½  hours | 7-8½  hours | 9 or more hours |
| **YES** How many TIMES a week?  |
| **NO** |
| 41. Do other kinds of exercises that were not mentioned earlier (mention them)? | How many TOTAL hours a week did you usually do it?  | Less than  1 hour | 1-2½  hours | 3-4½  hours | 5-6½  hours | 7-8½  hours | 9 or more hours |
| **YES** How many TIMES a week?  |
| **NO** |

**Thank You**
