# Supplementary material for: Cross-Cultural Adaptation of the Community Healthy Activities Model Program for Seniors (CHAMPS) Physical Activity Questionnaire Among Hausa Older Adults
Source: Research Square preprint supplement (doi:10.21203/rs.3.rs-8564131/v1), 2026-01-16
Supplement: Supplementary file 3 [file cfd3c977c74049674d0685fe.docx]

**OPEN-ENDED QUESTIONS**

1. Is there any items or questions that is difficult for you to understand or

1b: if any, what do you think about the item(s)?

1c. How certain are you of your answer?

2. What did you think about when answering item 5, 7, 11, 13, 16, 21, 29, 31, 32, 33, 40? ask the participant one at a time

3. Is it culturally relevant, or is it a common activity that you usually do? 5, 7, 11, 13, 16, 21,

29,31,32,33,40?

If the participant says the item is not relevant follow up with question

4. Do you know any activity or suggestion of any relevant activity?
