# Supplementary material for: Cross-Cultural Adaptation of the Community Healthy Activities Model Program for Seniors (CHAMPS) Physical Activity Questionnaire Among Hausa Older Adults
Source: Research Square preprint supplement (doi:10.21203/rs.3.rs-8564131/v1), 2026-01-16
Supplement: Supplementary file 4 [file d2843e78ce2db24d0d4758a7.docx]

Takardar karbar bayanan ayyuka CHAMPS wanda ya shafi dattawa

CHAMPS: Community Healthy Activities Model Program for Seniors Institute for Health & Aging, University of California San Francisco Stanford Center for Research in Disease Prevention, Stanford University (11/06/00) ©Copyright1998

Kwanan wata: suna ko katin shaida:

Do not reproduce without permission of the CHAMPS staffContact:AnitaL.Stewart,Ph.D.,UCSF,[anitast@itsa.ucsf.edu](mailto:anitast@itsa.ucsf.edu)

**Wannan jerin tambayoyin a kan ayyukan da ka gabatar a makonni huɗun da suka wuce ne. Tambayoyin da za su biyo baya a shafukan nan gaba iri ɗaya ne da misalin da aka bayar a ƙasa:**

**UMURNI**

# Idan ka yi ayyukan a cikin maƙonni huɗun da suka gabata:

# Mataki na#1 Duba akwatin E.

**Mataki na#2 Ka yi tunani sau nawa a maƙo ka kan yi, sannan ka rubuta amsar ka a filin da aka tanadar.**

# Mataki na#3 Ka yi da’irar iya yawan adadin awananin aikin nan da ka kan yi a cikin maƙo.

**Ga ɗan misali yadda Uwar gidan Malam Bala zata amsa waɗannan tambayoyi #1:** Uwar gidan Malam Bala ta kan kai ziyara wa ƙawayenta Maryam da Fatima sau biyu a sati. Ta kan yi awa ɗaya a wurin Maryam a kowacce ranar Litinin sai kuma ta kan yi awanin biyu kuma a kowacce ranar laraba tare da Fatima. Saboda haka, jumular awannin da take shafewa duk sati idan ta kai ziyara wa ƙawayenta ya kama awanin uku kacal.

| **A kowanne maƙo, a cikin maƙonni huɗu da suka gabata, shin ka …** |  | | | | | | |
| --- | --- | --- | --- | --- | --- | --- | --- |
| 1.ziyarci abokanka ko ‘yanuwa (ban da waɗanda kake zama tare da su)?   - **E** sau nawa a maƙo?    **A’a** | A jumlance AWANNI nawa yawanci kake yi a maƙo? | kasada  awa 1 | Awa 1-2½ | Awa 3-4½ | Awa 5-6½ | Awa 7-8½ | Awa 9 zuwasama |


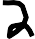
**Idan BA KA aikata wannan aikin ba:**

- **Canki A’a sannan ka duba amsar tambaya ta gaba**

| **A kowanne maƙo, a cikin maƙonni huɗu da suka gabata, shin ka …** |  | | | | | | |
| --- | --- | --- | --- | --- | --- | --- | --- |
| 1. Ziyarci abokanka ko ‘yanuwa (ban da waɗanda kake zama tare da su)? | A jumlance AWANNI nawa yawanci kake yi a maƙo? | kasada  awa 1 | Awa 1-2½ | Awa 3-4½ | Awa 5-6½ | Awa 7-8½ | Awa 9 zuwasama |
| **E** Sau nawa a maƙo?  |  |  |  |  |  |  |  |
| **A’a** |
| 1. zuwa majalisin dattijai (misali wadanda suka yi ritaya)? | A jumlance AWANNI nawa yawanci kake yi a maƙo? | kasada  awa 1 | Awa 1-2½ | Awa 3-4½ | Awa 5-6½ | Awa 7-8½ | Awa 9 zuwasama |
| **E** Sau nawa a maƙo?  |  |  |  |  |  |  |  |
| **A’a** |
| 1. Gabatar da aikin sa kai? | A jumlance AWANNI nawa yawanci kake yi a maƙo? | kasada  awa 1 | Awa 1-2½ | Awa 3-4½ | Awa 5-6½ | Awa 7-8½ | Awa 9 zuwasama |
| **E** Sau nawa a maƙo?  |  |  |  |  |  |  |  |
| **A’a** |
| 1. Halarci gurin ibada ko gabatar da wani aiki a gurin?culturally adapted(experiential equivalent) | A jumlance AWANNI nawa yawanci kake yi a maƙo? | kasada  awa 1 | Awa 1-2½ | Awa 3-4½ | Awa 5-6½ | Awa 7-8½ | Awa 9 zuwasama |
| **E** Sau nawa a maƙo?  |  |  |  |  |  |  |  |
| **A’a** |
| 1. Halarci sauran dandali ko tattaunawa ta kungiya? | A jumlance AWANNI nawa yawanci kake yi a maƙo? | kasada  awa 1 | Awa 1-2½ | Awa 3-4½ | Awa 5-6½ | Awa 7-8½ | Awa 9 zuwasama |
| **E** Sau nawa a maƙo?  |  |  |  |  |  |  |  |
| **A’a** |
| 1. Amfani da Wayar salula?(conceptual) | A jumlance AWANNI nawa yawanci kake yi a sati? | kasada  awa 1 | Awa 1-2½ | Awa 3-4½ | Awa 5-6½ | Awa 7-8½ | Awa 9 zuwasama |
| **E** Sau nawa a maƙo?  |  |  |  |  |  |  |  |
| **A’a** |

| **A kowanne maƙo, a cikin maƙonni huɗu da suka gabata, shin ka yi …** |  | | | | | | |
| --- | --- | --- | --- | --- | --- | --- | --- |
| 1. Rawar (kamar na ƙoroso, mandiri) (banda rawar atisayen motsa jiki)? | A jumlance AWANNI nawa yawanci kake yi a maƙo? | kasada  awa 1 | Awa 1-2½ | Awa 3-4½ | Awa 5-6½ | Awa 7-8½ | Awa 9 zuwasama |
| **E** Sau nawa a maƙo?  |
| **A’a** |
| 1. Aikin hannu na saka, sassaka, dinki, da sauransu? | A jumlance AWANNI nawa yawanci kake yi a maƙo? | kasada  awa 1 | Awa 1-2½ | Awa 3-4½ | Awa 5-6½ | Awa 7-8½ | Awa 9 zuwasama |
| **E** Sau nawa a maƙo?  |
| **A’a** |
| 1. zuwa kasuwa kuma ka ɗau dakon kayanka da kanka (ka lissafa lokutan tattaki kawai)? (golf activity replaced with market) | A jumlance AWANNI nawa yawanci kake yi a maƙo? | kasada  awa 1 | Awa 1-2½ | Awa 3-4½ | Awa 5-6½ | Awa 7-8½ | Awa 9 zuwasama |
| **E** Sau nawa a maƙo?  |  |  |  |  |  |  |  |
| **A’a** |
| 1. zuwa kasuwa da daukan kaya mara nauyi/ ko bada dakon kayanka (ka lissafa lokutan tattaki kawai)? | A jumlance AWANNI nawa yawanci kake yi a maƙo? | kasada  awa 1 | Awa 1-2½ | Awa 3-4½ | Awa 5-6½ | Awa 7-8½ | Awa 9 zuwasama |
| **E** Sau nawa a maƙo?  |  |  |  |  |  |  |  |
| **A’a** |
| 1. Halarci dandali, sinima, taron karatu ko kuma wasanni? | A jumlance AWANNI nawa yawanci kake yi a maƙo? | kasada  awa 1 | Awa 1-2½ | Awa 3-4½ | Awa 5-6½ | Awa 7-8½ | Awa 9 zuwasama |
| - **E** Sau nawa a maƙo?  |
| **A’a** |
| 1. Wasan karta, dara, ludoo da wasu mutane? | A jumlance AWANNI nawa yawanci kake yi a sati? | kasada  awa 1 | Awa 1-2½ | Awa 3-4½ | Awa 5-6½ | Awa 7-8½ | Awa 9 zuwasama |
| **E** Sau nawa a maƙo?  |  |  |  |  |  |  |  |
| **A’a** |

| **A kowanne maƙo, a cikin maƙonni huɗu da suka gabata, shin ka yi…** |  | | | | | | |
| --- | --- | --- | --- | --- | --- | --- | --- |
| 1. wasan sunuka? | A jumlance AWANNI nawa yawanci kake yi a maƙo? | kasada  awa 1 | Awa 1-2½ | Awa 3-4½ | Awa 5-6½ | Awa 7-8½ | Awa 9 zuwasama |
| **E** Sau nawa a maƙo?  |  |  |  |  |  |  |  |
| **A’a** |
| 1. debo ruwa daga rijiya zuwa cikin gida (kar ka lissafa debo ruwa daga famfo )? | A jumlance AWANNI nawa yawanci kake yi a maƙo? | kasada  awa 1 | Awa 1-2½ | Awa 3-4½ | Awa 5-6½ | Awa 7-8½ | Awa 9 zuwasama |
| **E** Sau nawa a maƙo?  |  |  |  |  |  |  |  |
| **A’a** |
| 1. debo ruwa daga famfo zuwa cikin gida (kar ka lissafa debo ruwa daga rijiya)? | A jumlance AWANNI nawa yawanci kake yi a maƙo? | kasada  awa 1 | Awa 1-2½ | Awa 3-4½ | Awa 5-6½ | Awa 7-8½ | Awa 9 zuwasama |
| **E** Sau nawa a maƙo?  |  |  |  |  |  |  |  |
| **A’a** |
| 1. Tsalle-tsalle (domin motsa jiki)? | A jumlance AWANNI nawa yawanci kake yi a maƙo? | kasada  awa 1 | Awa 1-2½ | Awa 3-4½ | Awa 5-6½ | Awa 7-8½ | Awa 9 zuwasama |
| **E** Sau nawa a maƙo?  |  |  |  |  |  |  |  |
| **A’a** |
| 1. Wasa da abin kida? | A jumlance AWANNI nawa yawanci kake yi a maƙo? | kasada  awa 1 | Awa 1-2½ | Awa 3-4½ | Awa 5-6½ | Awa 7-8½ | Awa 9 zuwasama |
| **E** Sau nawa a maƙo?  |  |  |  |  |  |  |  |
| **A’a** |
| 1. Karatu? | A jumlance AWANNI nawa yawanci kake yi a maƙo? | kasada  awa 1 | Awa 1-2½ | Awa 3-4½ | Awa 5-6½ | Awa 7-8½ | Awa 9 zuwasama |
| **E** Sau nawa a maƙo?  |  |  |  |  |  |  |  |
| **A’a** |
| 19.Aikin karfi a cikingida(kamar su goge taga, sharan kwata)? | A jumlance AWANNI nawa yawanci kake yi a sati? | kasada  awa 1 | Awa 1-2½ | Awa 3-4½ | Awa 5-6½ | Awa 7-8½ | Awa 9 zuwasama |
| **E** Sau nawa a maƙo?  |  |  |  |  |  |  |  |
| **A’a** |

| **A kowanne maƙo, a cikin maƙonni huɗu da suka gabata, shin ka yi…** |  | | | | | | |
| --- | --- | --- | --- | --- | --- | --- | --- |
| 20. Aikin gida na yau da kullum marasa wahala (kamar su shara ko goge-goge)? | A jumlance AWANNI nawa yawanci kake yi a maƙo? | kasada  awa 1 | Awa 1-2½ | Awa 3-4½ | Awa 5-6½ | Awa 7-8½ | Awa 9 zuwasama |
| **E** Sau nawa a maƙo?  |  |  |  |  |  |  |  |
| **A’a** |
| 1. yin aikin lambu mai wahala (kamar yin kunya, yin amfani da manjakara Cire ciyawa )? | A jumlance AWANNI nawa yawanci kake yi a maƙo? | kasada  awa 1 | Awa 1-2½ | Awa 3-4½ | Awa 5-6½ | Awa 7-8½ | Awa 9 zuwasama |
| **E** Sau nawa a maƙo?  |  |  |  |  |  |  |  |
| **A’a** |
| 1. Aikin lambu mara wahala a bayan gidan (kamar su yiwa shuka bayi)? | A jumlance AWANNI nawa yawanci kake yi a maƙo? | kasada  awa 1 | Awa 1-2½ | Awa 3-4½ | Awa 5-6½ | Awa 7-8½ | Awa 9 zuwasama |
| **E** Sau nawa a maƙo?  |  |  |  |  |  |  |  |
| **A’a** |
| 1. Gyaran motarka ta hawa, ko motar daukar kaya, babur , da sauran injuna? | A jumlance AWANNI nawa yawanci kake yi a maƙo? | kasada  awa 1 | Awa 1-2½ | Awa 3-4½ | Awa 5-6½ | Awa 7-8½ | Awa 9 zuwasama |
| **E** Sau nawa a maƙo?  |  |  |  |  |  |  |  |
| **A’a** |

****Ka lura: wajen amsa tambayoyin da suke kasa na tsere da tattaki ne, za ka iya kara da na’urar da ake hawa a yi gudu a kai.**

| | 1. Sassarfa ko tsere? **E** Sau nawa a maƙo?  | | --- | | **A’a** | | A jumlance AWANNI nawa yawanci kake yi a maƙo? | kasada  awa 1 | Awa 1-2½ | Awa 3-4½ | Awa 5-6½ | Awa 7-8½ | Awa 9 zuwasama |
| --- | --- | --- | --- | --- | --- | --- | --- | --- | --- |
| 1. Hawa beni da dan sauri (a kirga lokacin hawan kawai)? | A jumlance AWANNI nawa yawanci kake yi a maƙo? | kasada  awa 1 | Awa 1-2½ | Awa 3-4½ | Awa 5-6½ | Awa 7-8½ | Awa 9 zuwasama |
| **E** Sau nawa a maƙo?  |  |  |  |  |  |  |  |
| **A’a** |

| **A kowanne maƙo, a cikin maƙonni huɗu da suka gabata, shin ka yi …** |  | | | | | | |
| --- | --- | --- | --- | --- | --- | --- | --- |
| 1. Tafiya da sauri ko da gudu domin motsa jiki (kar ka lissafa lokacin da ya shafi tafiyar da ka yi domin nishadi)? | A jumlance AWANNI nawa yawanci kake yi a maƙo? | kasada  awa 1 | Awa 1-2½ | Awa 3-4½ | Awa 5-6½ | Awa 7-8½ | Awa 9 zuwasama |
| **E** Sau nawa a maƙo?  |  |  |  |  |  |  |  |
| **A’a** |
| 1. Tattaki don cefane (kamar daga kasuwa zuwa gida ko dauko yara daga makaranta (ka lissafa lokacin da kake tafiya kawai)? | A jumlance AWANNI nawa yawanci kake yi a maƙo? | kasada  awa 1 | Awa 1-2½ | Awa 3-4½ | Awa 5-6½ | Awa 7-8½ | Awa 9 zuwasama |
| **E** Sau nawa a maƙo?   **A’a** |
| 1. Tattaki cikin nishadi saboda motsa jiki ko jin dadi? | A jumlance AWANNI nawa yawanci kake yi a maƙo? | kasada  awa 1 | Awa 1-2½ | Awa 3-4½ | Awa 5-6½ | Awa 7-8½ | Awa 9 zuwasama |
| **E** Sau nawa a maƙo?  |
| **A’a** |
| 29.Tuka keke ko kuma keken motsa jiki? | A jumlance AWANNI nawa yawanci kake yi a maƙo? | kasada  awa 1 | Awa 1-2½ | Awa 3-4½ | Awa 5-6½ | Awa 7-8½ | Awa 9 zuwasama |
| **E** Sau nawa a maƙo?  |
| **A’a** |
| 30. Amfani da na’urar motsa jiki kamar wadda ake zama aja ko takawa (kar ka lissafa na’urar da ake hawa don yin gudu, ko kuma keken motsa jiki)? | A jumlance AWANNI nawa yawanci kake yi a maƙo? | kasada  awa 1 | Awa 1-2½ | Awa 3-4½ | Awa 5-6½ | Awa 7-8½ | Awa 9 zuwasama |
| **E** Sau nawa a maƙo?   **A’a** |
| 31. Yin aikin gona, mai bukatar matsakaici kuzari  **E** Sau nawa a maƙo?   **A’a** | A jumlance AWANNI nawa yawanci kake yi a maƙo? | kasada  awa 1 | Awa 1-2½ | Awa 3-4½ | Awa 5-6½ | Awa 7-8½ | Awa 9 zuwasama |
|  |

| **A kowanne maƙo, a cikin maƙonni huɗu da suka gabata, shin ka yi …** |  | | | | | | |
| --- | --- | --- | --- | --- | --- | --- | --- |
| 32. Yin aikin gona, mai bukatar kuzari dan kadan | A jumlance AWANNI nawa yawanci kake yi a maƙo? | kasada  awa 1 | Awa 1-2½ | Awa 3-4½ | Awa 5-6½ | Awa 7-8½ | Awa 9 zuwasama |
| **E** Sau nawa a maƙo?  |
| **A’a** |
| 33. Yin aikin gona, ciyar da kananun dabbobi | A jumlance AWANNI nawa yawanci kake yi a maƙo? | kasada  awa 1 | Awa 1-2½ | Awa 3-4½ | Awa 5-6½ | Awa 7-8½ | Awa 9 zuwasama |
| **E** Sau nawa a maƙo?  |
| **A’a** |
| 34. mimmiƙa na motsa jiki ko lallanƙwasa jiki domin motsa jiki (banda lokacin daya shafi kalula) | A jumlance AWANNI nawa yawanci kake yi a maƙo? | kasada  awa 1 | Awa 1-2½ | Awa 3-4½ | Awa 5-6½ | Awa 7-8½ | Awa 9 zuwasama |
| **E** Sau nawa a maƙo?  |
| **A’a** |
| 35. yin kalula? | A jumlance AWANNI nawa yawanci kake yi a maƙo? | kasada  awa 1 | Awa 1-2½ | Awa 3-4½ | Awa 5-6½ | Awa 7-8½ | Awa 9 zuwasama |
| **E** Sau nawa a maƙo?  |
| **A’a** |
| 36. motsa jiki ko rawa na motsa jiki? | A jumlance AWANNI nawa yawanci kake yi a maƙo? | kasada  awa 1 | Awa 1-2½ | Awa 3-4½ | Awa 5-6½ | Awa 7-8½ | Awa 9 zuwasama |
| **E** Sau nawa a maƙo?  |
| **A’a** |
| 37. Attisayi masu dan tsauri har zuwa ga masu tsauri ainun don kara karfi (Ta hanyar daga abu mai nauyi sama da kilo biyu amfani da na’urar kara karfi da sauransu)? | A jumlance AWANNI nawa yawanci kake yi a maƙo? | kasada  awa 1 | Awa 1-2½ | Awa 3-4½ | Awa 5-6½ | Awa 7-8½ | Awa 9 zuwasama |
| **E** Sau nawa a maƙo?  |
| **A’a** |

| **A kowanne maƙo, a cikin maƙonni huɗu da suka gabata, shin ka yi …** |  | | | | | | |
| --- | --- | --- | --- | --- | --- | --- | --- |
| 38 Atisayen kara karfi mara tsanani (ta hanyar daukan kilo biyu. ko kasa da haka ko amfani da danko mai karfi)? | A jumlance AWANNI nawa yawanci kake yi a maƙo? | kasada  awa 1 | Awa 1-2½ | Awa 3-4½ | Awa 5-6½ | Awa 7-8½ | Awa 9 zuwasama |
| **E** Sau nawa a maƙo?  |
| **A’a** |
| 39. Attisayin motsa dukkannin gangan jiki, ta hanyar yin amfani da nauyin jikinka (kar ka lissafa attisayin ƙarfafa jiki)? | A jumlance AWANNI nawa yawanci kake yi a maƙo? | kasada  awa 1 | Awa 1-2½ | Awa 3-4½ | Awa 5-6½ | Awa 7-8½ | Awa 9 zuwasama |
| **E** Sau nawa a maƙo?  |
| **A’a** |
| 40. Wasan kwallon Kwando, kwallon kafa, ko kwallon rariya (kar ka lissafa lokutan da ka yi ba a cikin filin was aba)? | A jumlance AWANNI nawa yawanci kake yi a maƙo? | kasada  awa 1 | Awa 1-2½ | Awa 3-4½ | Awa 5-6½ | Awa 7-8½ | Awa 9 zuwasama |
| **E** Sau nawa a maƙo?  |
| **A’a** |
| 41. Sauran nau’in motsa jiki wanda ba’a fadaba a baya (ka ambace su)? | A jumlance AWANNI nawa yawanci kake yi a maƙo? | kasada  awa 1 | Awa 1-2½ | Awa 3-4½ | Awa 5-6½ | Awa 7-8½ | Awa 9 zuwasama |
|  |
| **E** Sau nawa a maƙo?  |
| **A’a** |

**NAGODE**
